# Supplementary material
Source: PubMed Central journal article supplement (PMC8940630)
Supplement: NIHMS1747226-supplement-1.pdf [file NIHMS1747226-supplement-1.pdf]

Table S1: Total count for each utilization category and frequency/100 person-years by race

|                                          | <b>Non-Hispanic<br/>White</b> | <b>Black/African<br/>American</b> | <b>Hispanic</b>   | <b>Asian</b>      |
|------------------------------------------|-------------------------------|-----------------------------------|-------------------|-------------------|
| <b>Utilization category, n (n/100PY)</b> |                               |                                   |                   |                   |
| Outpatient                               | 405 109 (311.7)               | 60 662 (287.9)                    | 25 344<br>(300.3) | 16 794<br>(334.5) |
| Inpatient/ED                             | 228 (0.2)                     | 77 (0.4)                          | 29 (0.3)          | n<10              |
| Nursing facility/home visit              | 981 (0.8)                     | 398 (1.9)                         | 100 (1.2)         | 43 (0.9)          |
| VF tests                                 | 93 372 (71.8)                 | 14 232 (67.5)                     | 5 922 (70.2)      | 4 027 (80.2)      |
| RNFL OCT tests                           | 140 483 (108.1)               | 17 253 (81.9)                     | 8 074 (95.7)      | 5 306 (105.7)     |
| SLT                                      | 7 047 (5.4)                   | 1 100 (5.2)                       | 568 (6.7)         | 290 (5.8)         |
| Glaucoma surgery                         | 3 711 (2.9)                   | 746 (3.5)                         | 225 (2.7)         | 152 (3)           |
